# Supplementary material for: Impact of rainfall variability on sedimentary and hydropower dynamics in a dam reservoir of southern France
Source: Copernicus journal article supplement (doi:10.5194/egusphere-2025-2127), 2025-06-17
Supplement: Supplementary file 1 [file egusphere-2025-2127-supplement.pdf]

# Supplementary Material for: Heavy rainfall, sediment, and hydropower in S. France

Paul Hazet et al.

## Contents

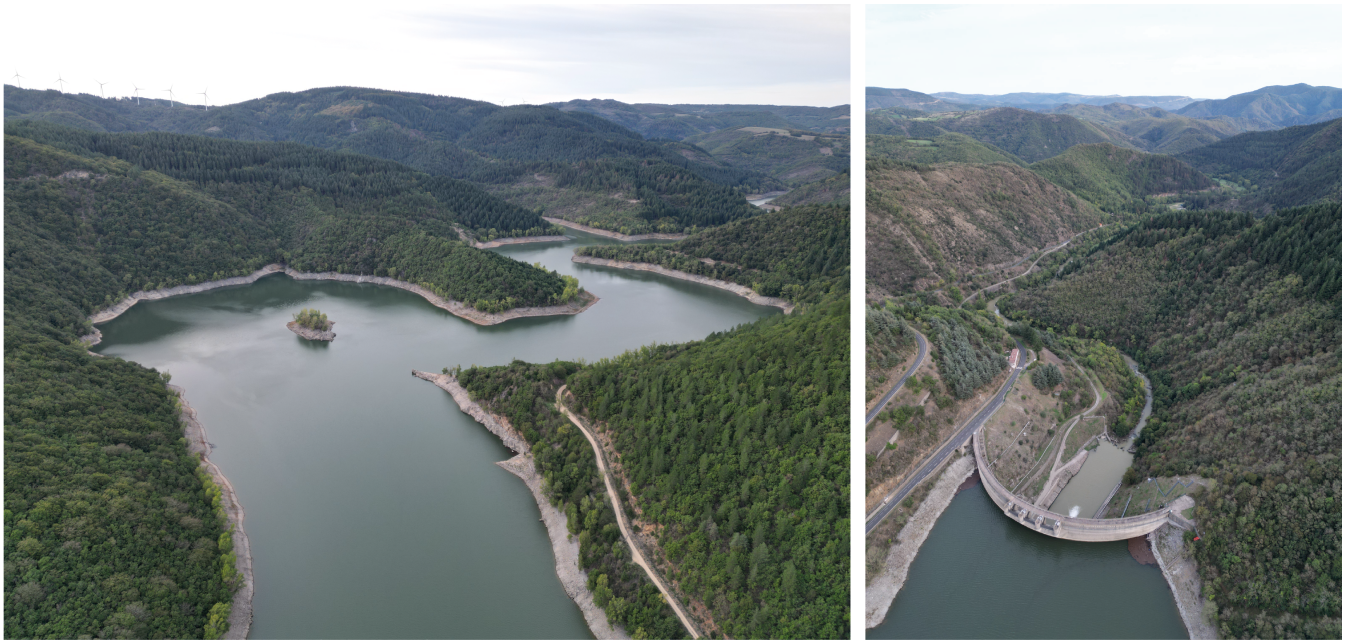

**Figure S1.** Avène lake (left) and Orb dam (right). Credit: A. Foucher, October 2023.

## Land Use Change

- Forests -> Pastures
- Forests -> Scrub and/or herbaceous vegetation associations
- Scrub and/or herbaceous vegetation associations -> Forests
- Scrub and/or herbaceous vegetation associations -> Pastures

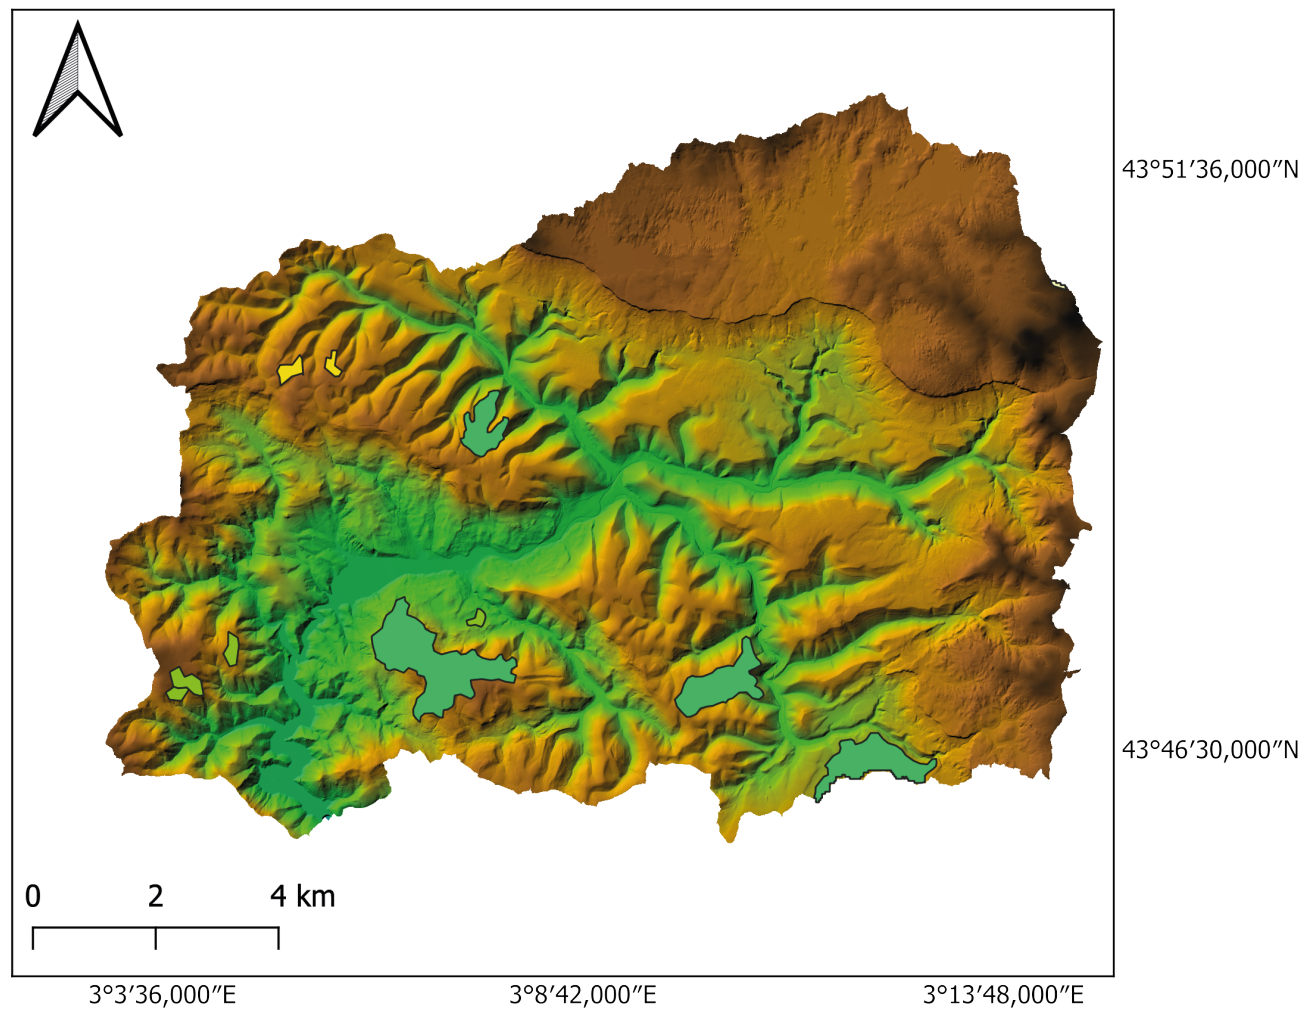

**Figure S2.** Land use changes (1990-2018) from IGN database showing urbanization patterns.

# Accumulated precipitation trend

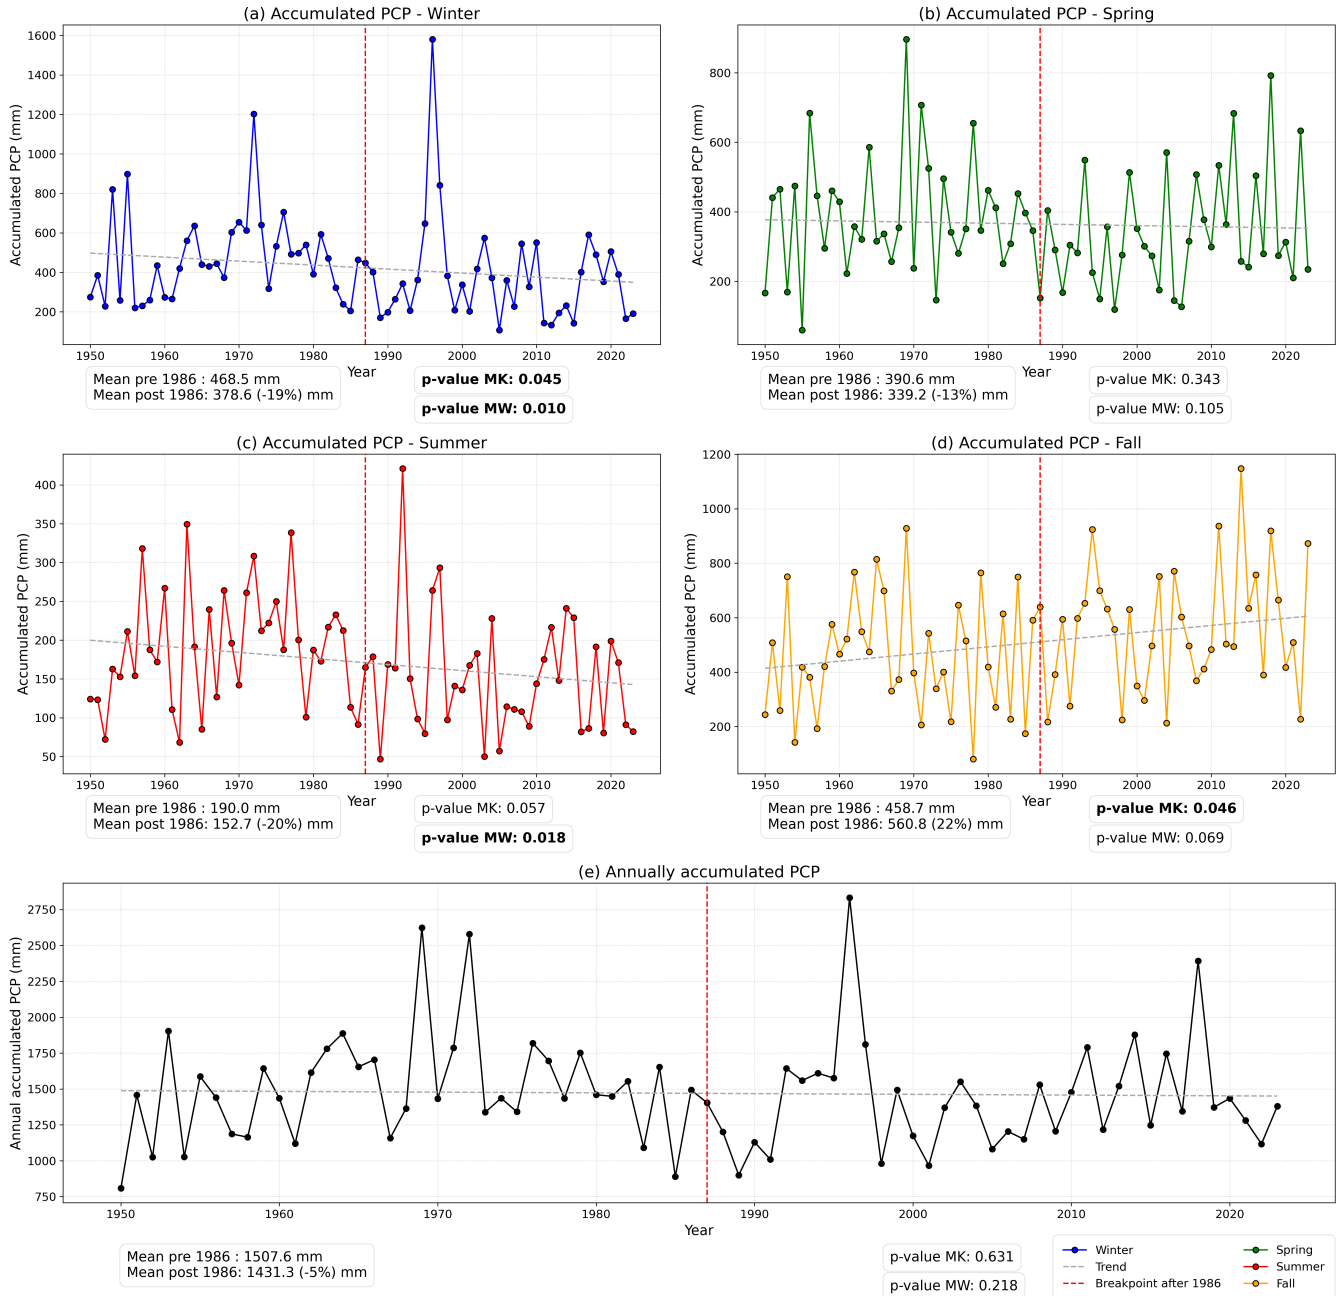

**Figure S3.** Seasonal and annual precipitation trends. Bold values indicate statistically significant changes (Mann-Whitney U test) and trends (Mann-Kendall test).

# Daily Precipitation variability

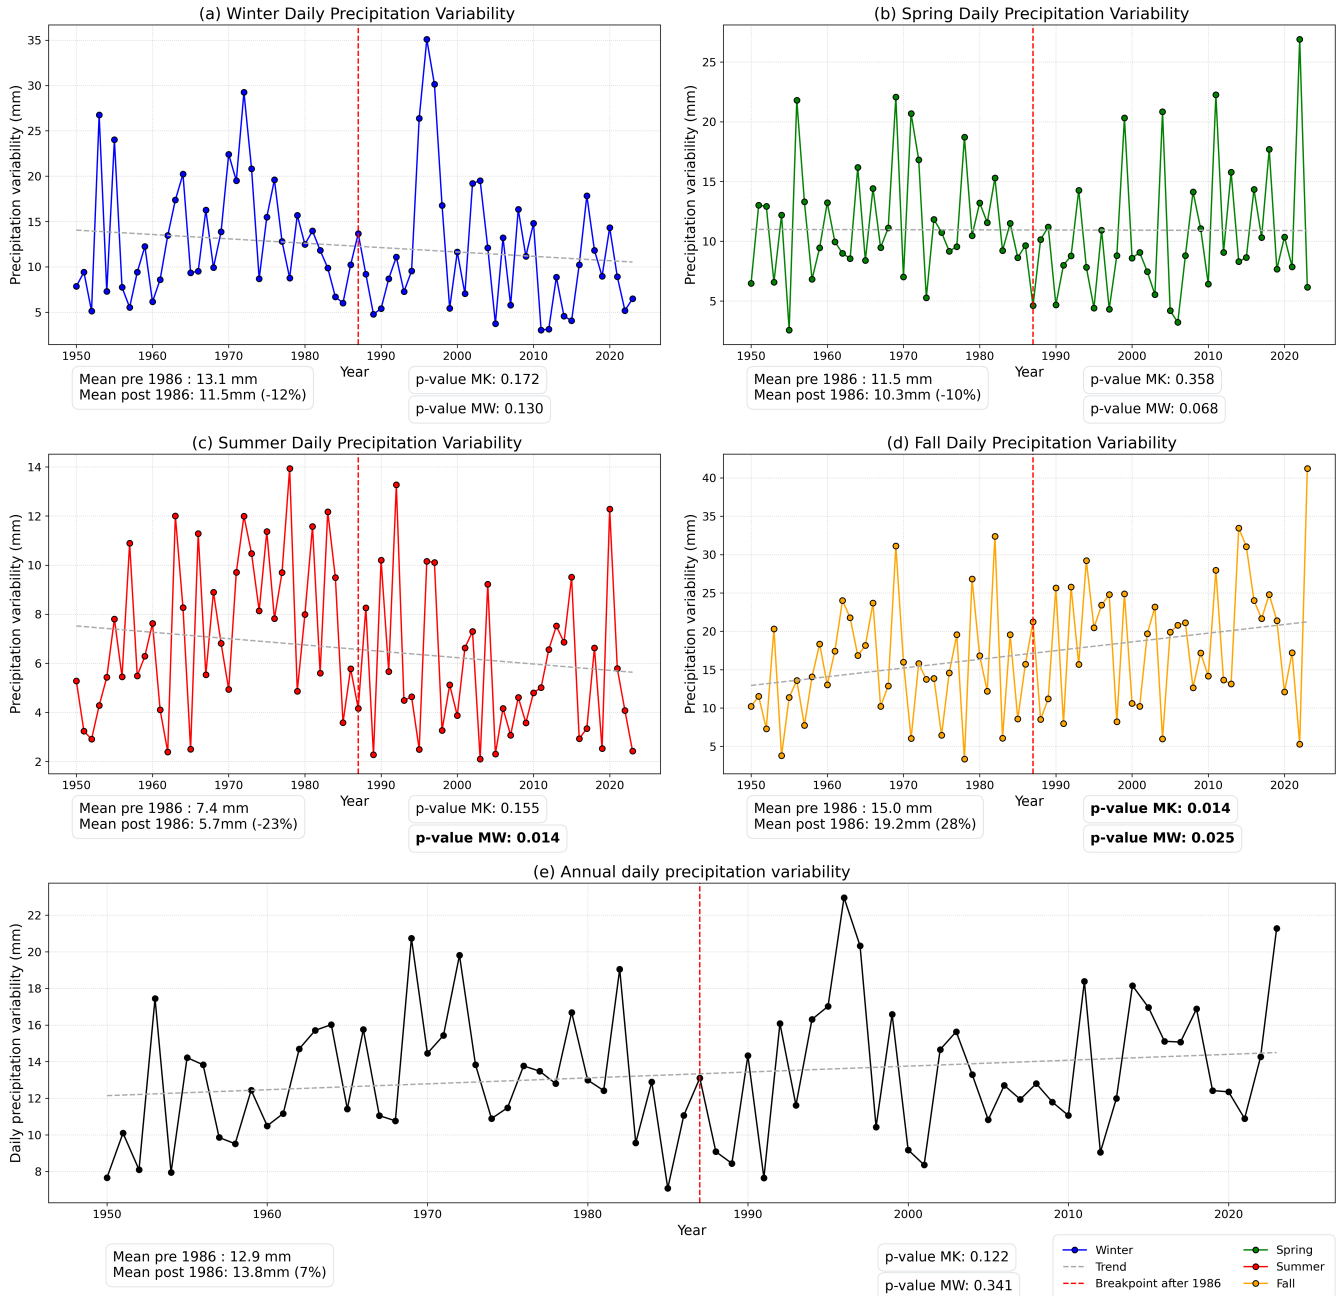

**Figure S4.** Precipitation variability analysis showing distributional shifts pre- and post-1986 (Mann-Whitney U) and monotonic trends (Mann-Kendall).



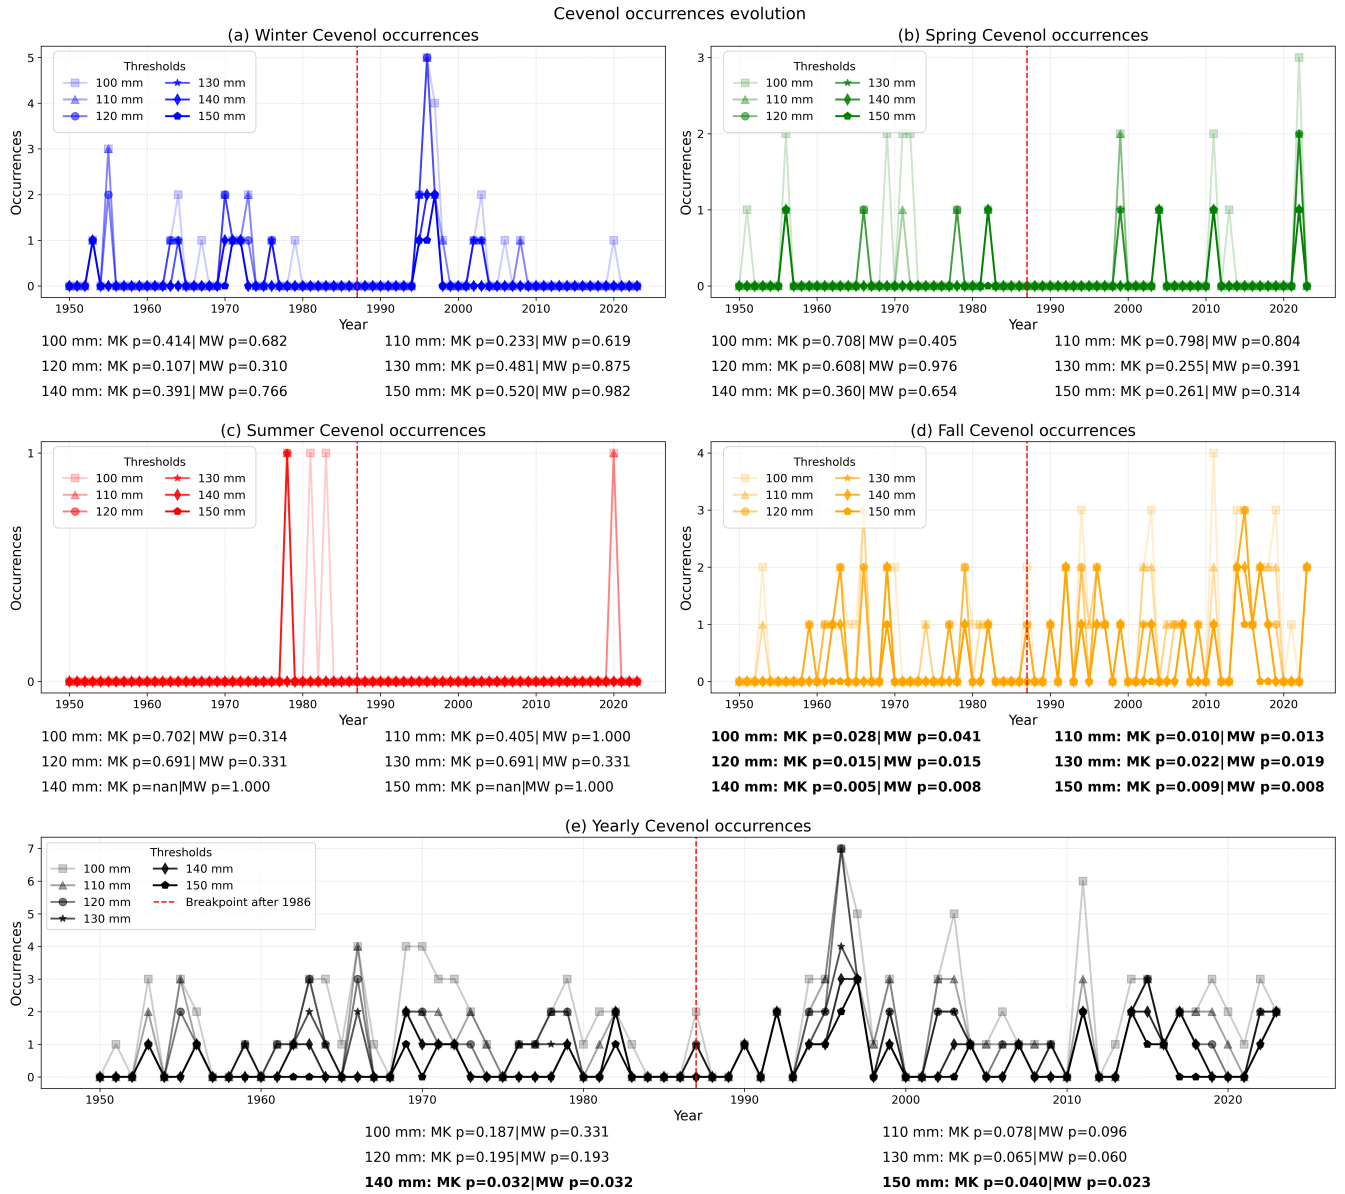

**Figure S5.** Frequency of Cevenol episodes showing significant increases in autumn (bold values, Mann-Whitney U and Mann-Kendall tests).

# Maximum Daily Precipitation

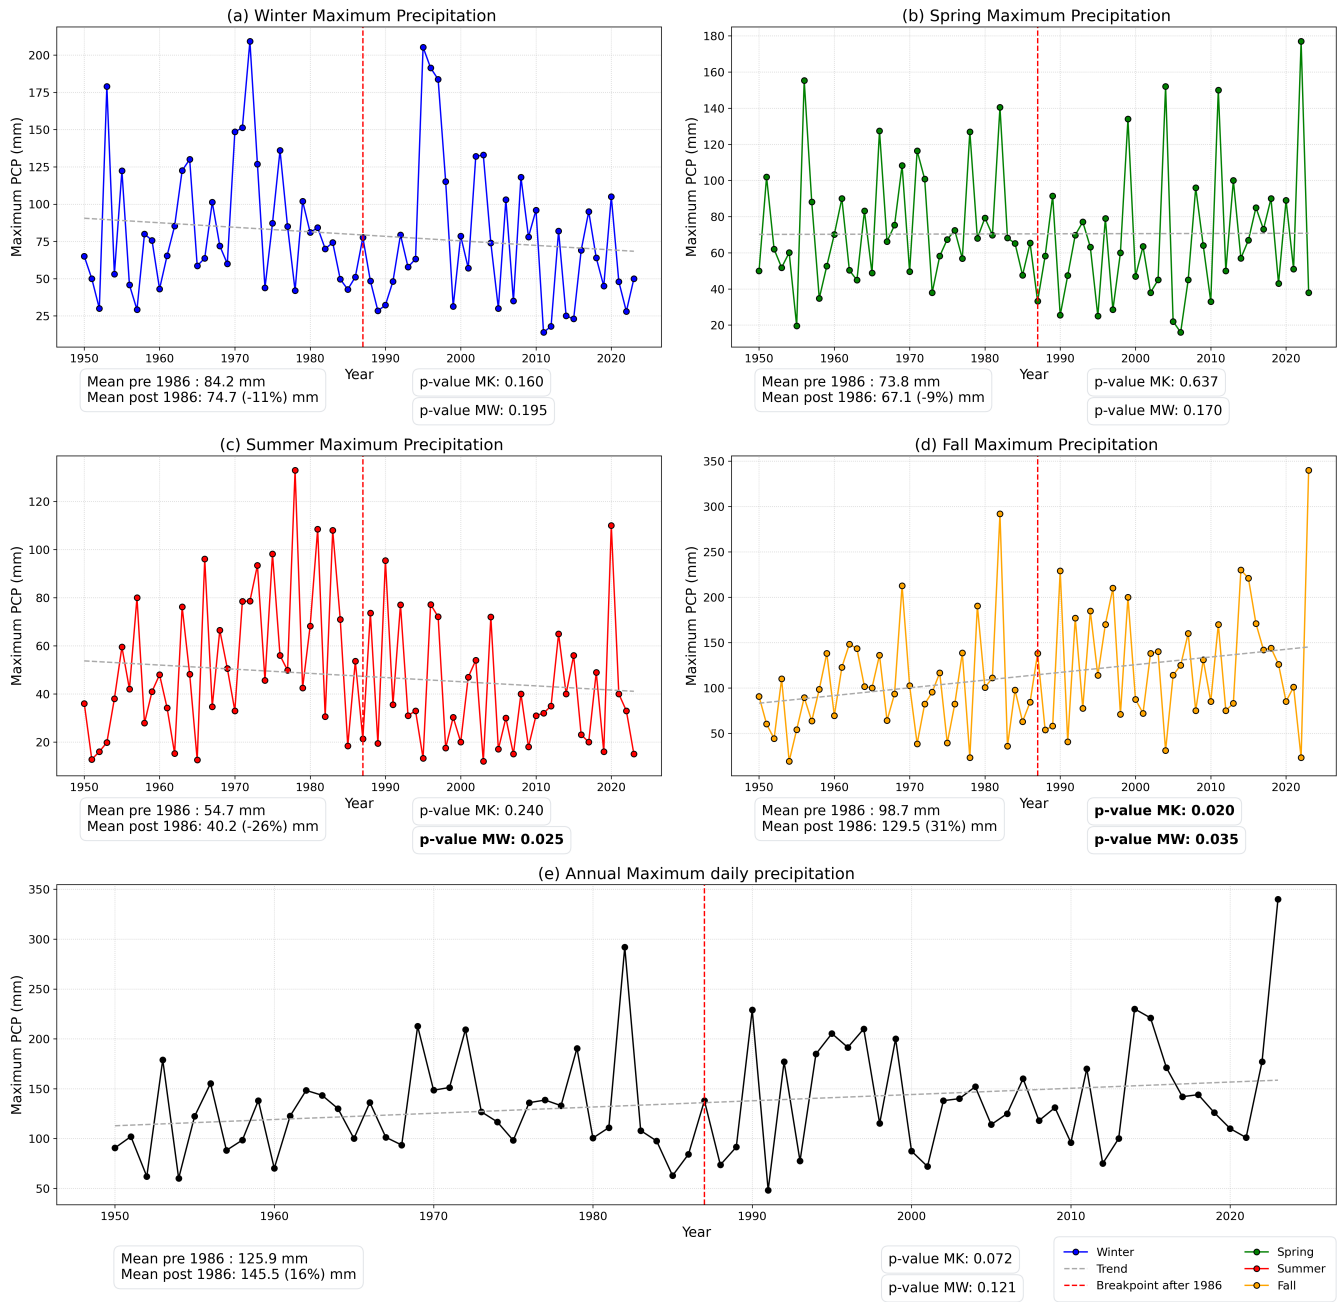

**Figure S6.** Intensity trends of Cevenol rainfall events. Significant results in bold.

# Consecutive Dry Days occurrences evolution

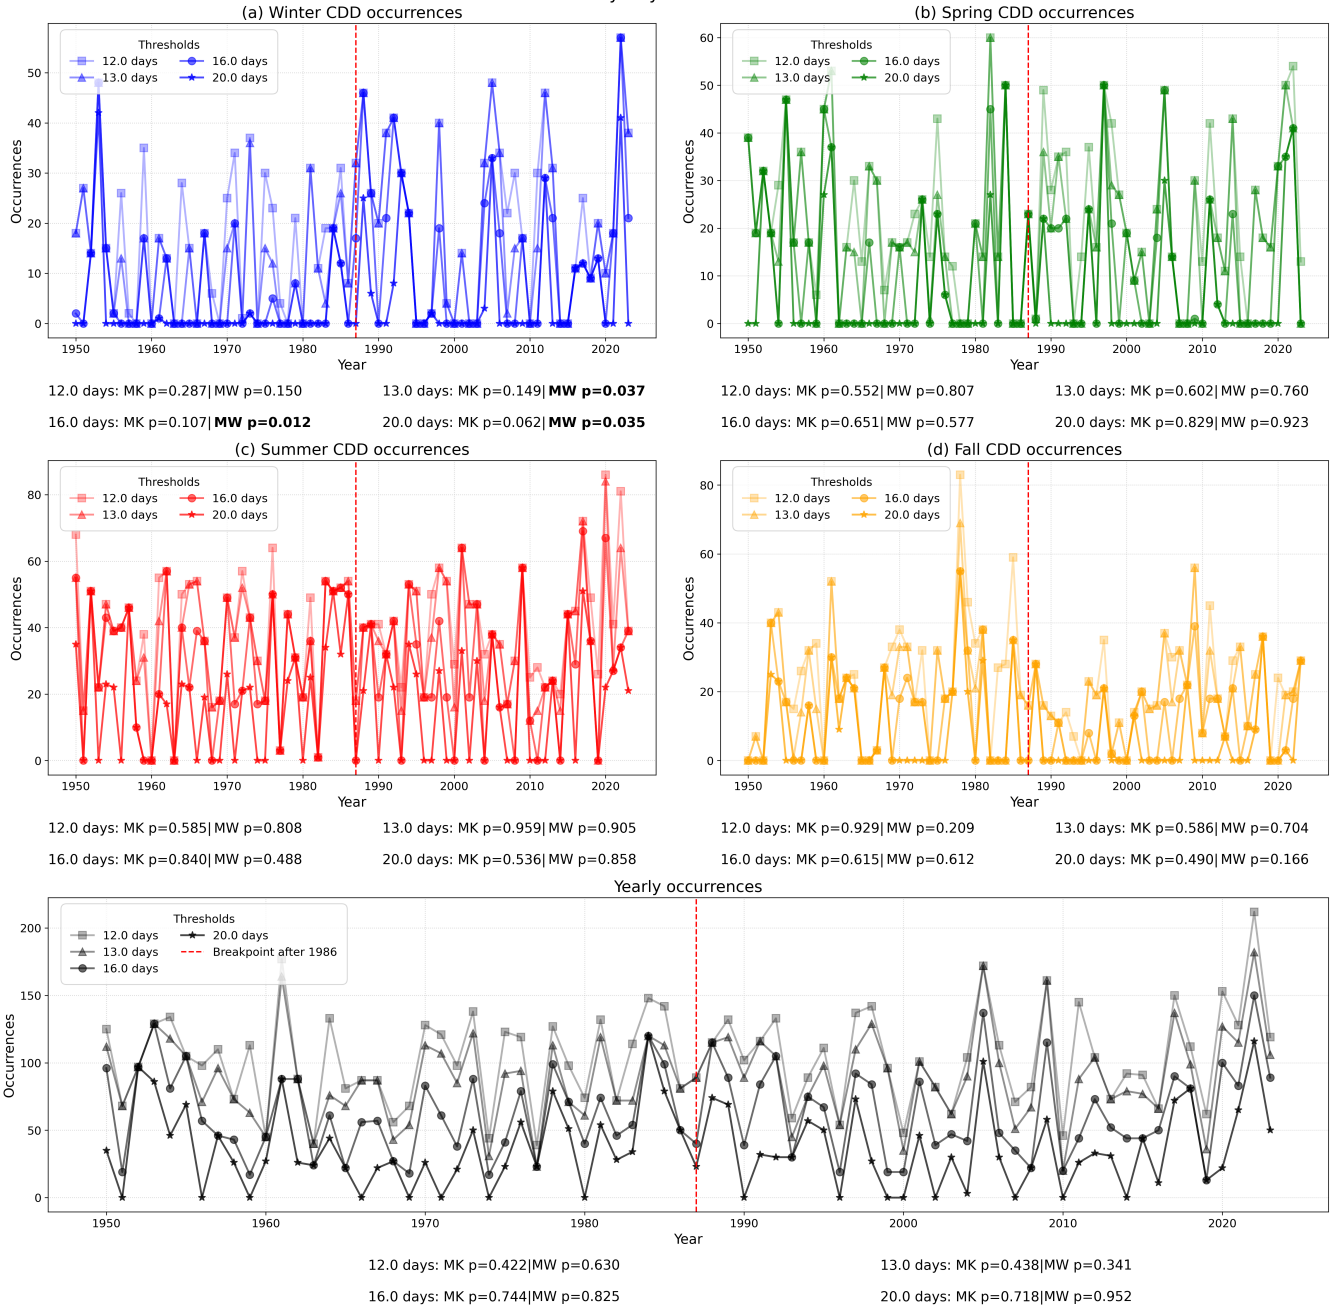

**Figure S7.** Consecutive Dry Days (CDD) frequency. Significant results in bold.

# Maximum Consecutive Dry Days evolution

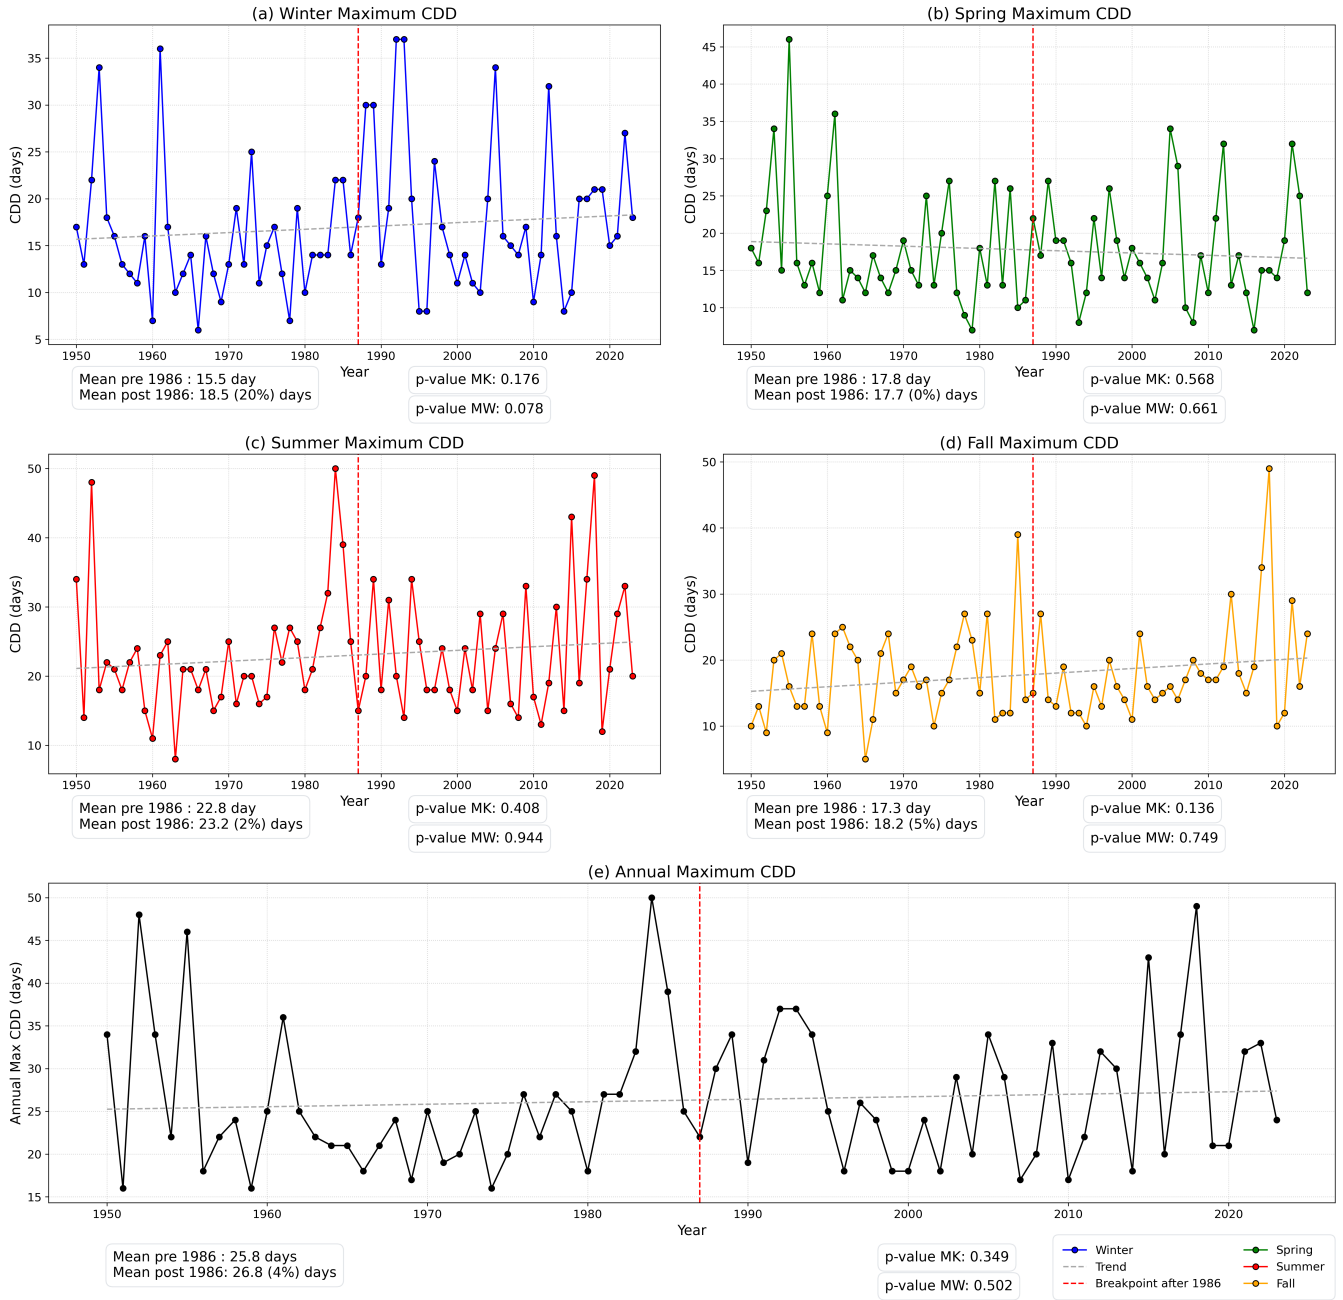

**Figure S8.** Drought intensity trends. Significance is shown with bold values.



## Impact of Precipitation on Hydropower Generation (1976-2024)

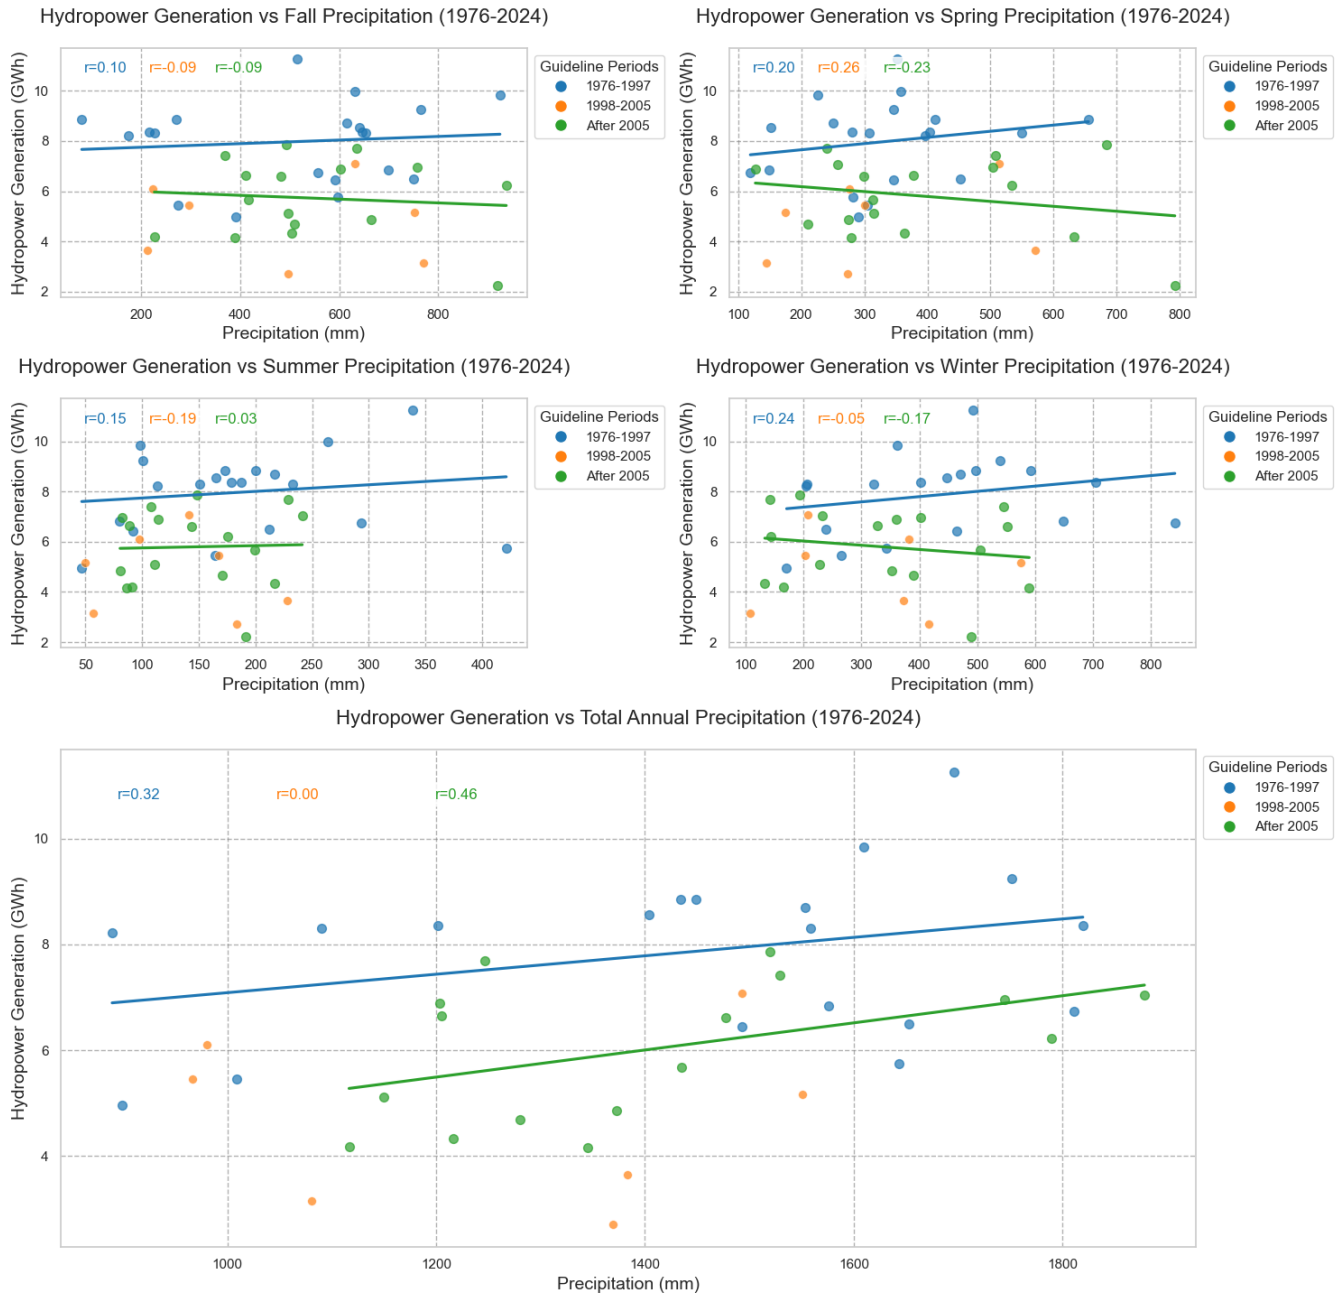

**Figure S9.** Hydropower production correlations with annual and seasonal precipitation.

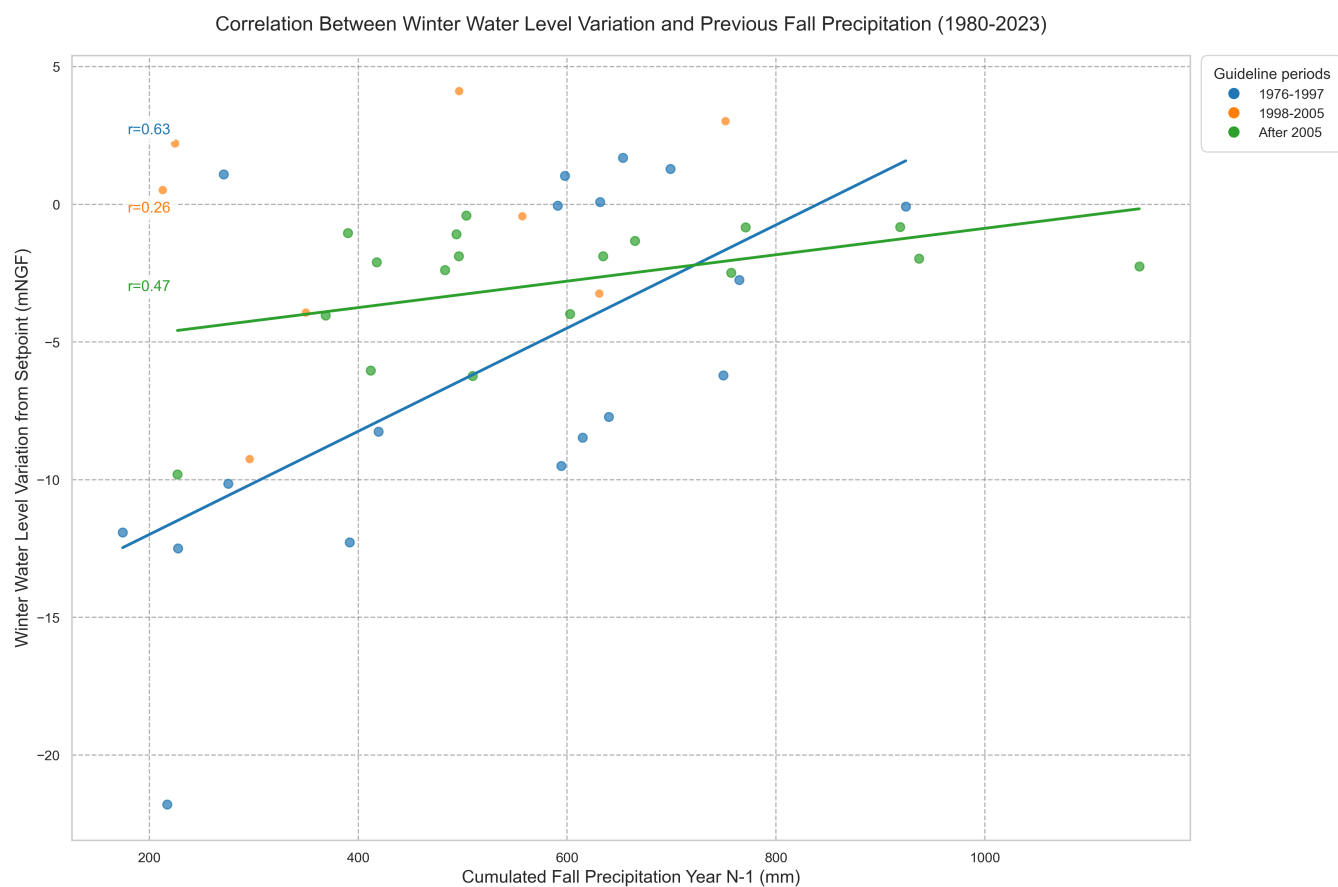

**Figure S10.** Correlation between average winter water level at year N and precipitation in fall at year N-1.

Hydropower under pressure: Mont d'Orb case study (France)

Context

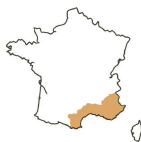

Study area: Southern France

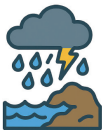

Mediterranean episodes

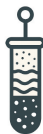

Sediment Core Analysis

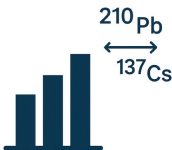

Radionuclide datation

Multidisciplinary approach

Key findings

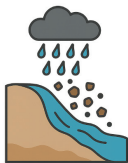

1% of rainfall ~ 55% of sediment

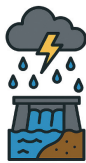

+87%-400% frequency  
+31% intensity

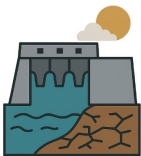

-20% winter rainfall

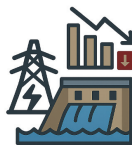

-25% hydropower

Future climate impacts

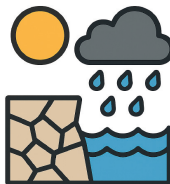

+Droughts / Extremes expected

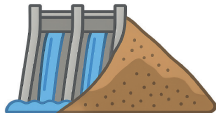

Combined effect with sediment accumulation

**Figure S11.** Graphical abstract summarising the key findings and methodological approach of the study.
